## Simultaneous detection of genetic and copy number alterations in *BRCA1/2* genes

Yosuke Hirotsu<sup>1</sup>, Yoshihiko Ooka<sup>1,2</sup>, Ikuko Sakamoto<sup>3</sup>, Hiroshi Nakagomi<sup>4</sup> and Masao Omata<sup>1,5</sup>

<sup>1</sup>Genome Analysis Center, Yamanashi Central Hospital, Kofu, Yamanashi 400-8506, Japan

<sup>2</sup>Department of Gastroenterology and Nephrology, Graduate School of Medicine, Chiba University, Chiba 260-8677, Japan

<sup>3</sup>Department of Obstetrics and Gynecology, Yamanashi Central Hospital, Fujimi Kofu-City, Yamanashi 400-8506, Japan

<sup>4</sup>Department of Breast Surgery, Yamanashi Central Hospital, Yamanashi 400-8506, Japan

<sup>5</sup>University of Tokyo, Hongo, Bunkyo-Ku, Tokyo 113-8655, Japan

**Correspondence to:** Yosuke Hirotsu, **email:** [hirotsu-bdyu@ych.pref.yamanashi.jp](mailto:hirotsu-bdyu@ych.pref.yamanashi.jp)

**Keywords:** *BRCA1*; *BRCA2*; mutation; copy number; diagnosis

**Received:** August 09, 2017

**Accepted:** November 11, 2017

**Published:** December 06, 2017

**Copyright:** Hirotsu et al. This is an open-access article distributed under the terms of the Creative Commons Attribution License 3.0 (CC BY 3.0), which permits unrestricted use, distribution, and reproduction in any medium, provided the original author and source are credited.

### ABSTRACT

**Germline mutations in *BRCA1* and *BRCA2* genes (*BRCA1/2*) predispose to hereditary breast and ovarian cancer syndrome (HBOC), and their dysregulation increases the risk of cancers. The detection of pathogenic *BRCA1/2* variants is essential for the diagnosis and prevention of HBOC, and for offering treatment decisions for patients. Therefore, there is a growing demand for the development of accurate, rapid assay systems that simultaneously detect pathogenic variants and copy number alterations. Here, we tested Thermo Fisher Scientific's newly developed OncoPrint<sup>®</sup> *BRCA1/2* Panel. We showed that all mutations in standard reference DNA were detected with high accuracy, and that values of allelic fractions were detected with high concordance ( $R^2 = 0.9986$ ). The OncoPrint<sup>®</sup> *BRCA1/2* Panel detected 21 pathogenic germline variants in 147 patients with breast and/or ovarian cancer, of which 20 were detected by the previously-launched Ion AmpliSeq<sup>™</sup> *BRCA1/2* Panel, except for one frameshift mutation. The OncoPrint<sup>®</sup> *BRCA1/2* Panel precisely captured one additional frameshift mutation, which is difficult to detect because of the homopolymer site. Large genomic deletion was identified in one sample, which was previously detected by multiplex ligation-dependent probe amplification. OncoPrint<sup>®</sup> *BRCA1/2* Panel could accurately detect pathogenic variant and copy number alteration, and be an alternative assay to investigate *BRCA1/2* germline and somatic mutations.**

### INTRODUCTION

*BRCA1* and *BRCA2* (*BRCA1/2*) are tumor suppressor genes with roles in the DNA repair process through their function in homologous recombination in response to DNA double-stranded breaks [1–5]. Germline heterozygous mutations in either *BRCA1* or *BRCA2* were previously shown to increase the overall risk of breast and of ovarian cancer by 40%–65% and 15%–45%,

respectively [6, 7]; therefore, genetic testing of *BRCA1/2* is used to diagnose hereditary breast and ovarian cancer syndrome (HBOC) [4, 7–9].

For cancer preventive options, risk-reducing mastectomies and salpingo-oophorectomies are effective in carriers of pathogenic *BRCA1/2* mutations [10]. The loss of function of *BRCA1/2* sensitizes cells to poly (ADP-ribose) polymerase (PARP) inhibitors [2, 11, 12], and findings from clinical trials have resulted in the PARP inhibitor olaparib

being approved for maintenance treatment of women with *BRCA1*- or *BRCA2*-mutated high-grade serous ovarian cancer, fallopian tube, or primary peritoneal cancer [11, 12]. Therefore, the genetic analysis of *BRCA1/2* is important for prevention, therapeutic decision-making, and proper management of breast and ovarian cancer patients.

Diagnostic testing for pathogenic *BRCA1/2* mutations is often performed by Sanger sequencing to identify single nucleotide alterations, insertions, and deletions, while large genomic alterations may be detected by the multiplex ligation-dependent probe amplification (MLPA) assay. Sanger sequencing and MLPA are considered gold standard methods to determine the *BRCA1/2* mutation status. *BRCA1/2* mutations are scattered throughout the entire coding region, and *BRCA1/2* proteins are relatively large (*BRCA1*: 1863, and *BRCA2*: 3418 amino acids) [1]. Because *BRCA1* and *BRCA2* gene contains 24 and 27 exons respectively, primer pairs or probes need to be designed at each site for Sanger sequencing and MLPA assay. When DNA samples were analyzed from many patients, it is necessary to analyze higher number of PCR amplicons. Therefore, these procedures are laborious and time-consuming.

Next-generation sequencing enables large numbers of nucleotide sequences of multiple samples to be simultaneously determined [13]. The enrichment of targeted regions is mainly conducted by PCR amplification or DNA capture hybridization, and targeted sequencing of genomic regions of interest can then be used for diagnosis in a clinical setting. With the advent of this technology, the genetic bases of cancers, Mendelian diseases, and congenital diseases have been revealed [14].

We previously analyzed the entire coding regions of *BRCA1/2* in patients with breast and ovarian cancer using the Ion AmpliSeq™ *BRCA1/2* Panel, which is based on a PCR amplification method [15, 16]. Recently, Thermo Fisher Scientific has launched a new panel: the OncoPrint® *BRCA1/2* Panel. In this study, we examined the performance of this panel using standard reference DNA with known *BRCA1/2* mutations and variant allelic fractions to assess the accuracy of germline and somatic mutation detection. Additionally, we used the OncoPrint® *BRCA1/2* Panel to detect germline mutations and copy number alterations in randomly-selected patients with breast and/or ovarian cancer, and compared our findings with the sequencing results of the Ion AmpliSeq™ *BRCA1/2* Panel.

## RESULTS

### Accuracy of *BRCA1/2* mutation detection

To assess the sensitivity and specificity of mutation detection using the OncoPrint® *BRCA1/2* Panel (Supplementary Table 1), we first used three standard reference DNAs (HD793, HC794, and HD795) purchased from Horizon (Cambridge, UK). These DNAs harbor either wild-type or mutated *BRCA1/2* at a pre-verified

allelic fraction of each mutated allele. We performed next-generation sequencing and obtained an average coverage depth of 2315× (range, 2103–2557×) (Supplementary Table 2). All mutations in the standard reference DNA were identified using the OncoPrint® *BRCA1/2* Panel (Table 1). Additionally, the observed variant allelic fraction significantly correlated with high accuracy ( $R^2 = 0.9986$ ) (Figure 1). These results show that the OncoPrint® *BRCA1/2* Panel is a highly accurate method of analyzing mutations with wide-ranging allelic fractions.

### Comparison of the panel designs and performance

We tested 147 buffy coat samples from patients with breast and/or ovarian cancer to detect germline variants by next-generation sequencing using the Ion AmpliSeq™ *BRCA1/2* Panel or OncoPrint® *BRCA1/2* Panel. The average coverage depths obtained were 555× (range, 107–7865×) and 840× (range, 159–2484×), respectively (Supplementary Table 3). The sequencing read length was relatively short in the OncoPrint® *BRCA1/2* Panel (range, 65–137 bp) compared with the Ion AmpliSeq™ *BRCA1/2* Panel (range, 71–239 bp) (Figure 2A). Overall, sequencing read mapping on the targeted region (mean ± SD: 98.9% ± 0.2% vs 96.5% ± 2.1%,  $p < 0.001$ ) was significantly higher with the OncoPrint® *BRCA1/2* Panel than the Ion AmpliSeq™ *BRCA1/2* Panel (Figure 2B). Uniformity (97.5% ± 3.0% vs 97.4% ± 2.8%,  $p < 0.05$ ) was comparable between two panels (Figure 2C).

### Comparison of the *BRCA1/2* panels

The Ion AmpliSeq™ *BRCA1/2* Panel detected 20 pathogenic *BRCA1/2* variants in 147 patients (five mutations in *BRCA1*; 15 mutations in *BRCA2*) (Table 2). By contrast, the OncoPrint® *BRCA1/2* Panel detected 21 pathogenic variants (five variants in *BRCA1*; 16 variants in *BRCA2*) (Table 2). There was 99.3% agreement between the Ion AmpliSeq™ *BRCA1/2* Panel and OncoPrint® *BRCA1/2* Panel, with 100% sensitivity and 95.2% specificity (Figure 3 and Table 2).

### Validation of discordant results

Among the 147 patients, pathogenic *BRCA1/2* variants were observed in 20 by both the OncoPrint® *BRCA1/2* Panel and Ion AmpliSeq™ *BRCA1/2* Panel. However, the novel pathogenic frameshift variants *BRCA2* p.K3032fs was only detected by the OncoPrint® *BRCA1/2* Panel in one patient. The mapped sequencing read visualized by the IGV revealed nucleotide deletion reads (Figure 4A). To validate this discordant result between the two panels, we performed Sanger sequencing and detected *BRCA2* p.K3032fs in the patient (Figure 4B).

We next examined the reason for the false-negative result from the Ion AmpliSeq™ *BRCA1/2* Panel.

**Table 1: BRCA1/2 variant detection in standard reference DNA using the OncoPrint<sup>®</sup> BRCA panel**

| Gene         | Mutation  | Expected Allelic Frequency (HD795) | Observed Allelic Frequency | Position              | Reference | Genotype    | Coding          |
|--------------|-----------|------------------------------------|----------------------------|-----------------------|-----------|-------------|-----------------|
| <i>BRCA1</i> | p.S1613G  | 7.5%                               | 6.7%                       | <i>chr17:41223094</i> | <i>T</i>  | <i>T/C</i>  | c.4900A>G       |
| <i>BRCA1</i> | p.K1183R  | 7.5%                               | 7.4%                       | <i>chr17:41244000</i> | <i>T</i>  | <i>T/C</i>  | c.3548A>G       |
| <i>BRCA1</i> | p.K820E   | 7.5%                               | 8.5%                       | <i>chr17:41245090</i> | <i>T</i>  | <i>T/C</i>  | c.2458A>G       |
| <i>BRCA1</i> | p.R1443X  | 32.5%                              | 30.8%                      | <i>chr17:41234451</i> | <i>G</i>  | <i>G/A</i>  | c.4327C>T       |
| <i>BRCA1</i> | p.D435Y   | 7.5%                               | 7%                         | <i>chr17:41246245</i> | <i>C</i>  | <i>C/A</i>  | c.1303G>T       |
| <i>BRCA1</i> | p.P871L   | 15%                                | 14%                        | <i>chr17:41244936</i> | <i>G</i>  | <i>G/A</i>  | c.2612C>T       |
| <i>BRCA2</i> | p.N289H   | 7.5%                               | 8%                         | <i>chr13:32906480</i> | <i>A</i>  | <i>A/C</i>  | c.865A>C        |
| <i>BRCA2</i> | p.V2466A  | 100%                               | 100%                       | <i>chr13:32929387</i> | <i>T</i>  | <i>C/C</i>  | c.7397T>C       |
| <i>BRCA2</i> | p.N991D   | 7.5%                               | 6.6%                       | <i>chr13:32911463</i> | <i>A</i>  | <i>A/G</i>  | c.2971A>G       |
| <i>BRCA2</i> | p.K1691fs | 32.5%                              | 33.4%                      | <i>chr13:32913558</i> | <i>CA</i> | <i>CA/C</i> | c.5067_5067delA |
| <i>BRCA2</i> | p.N1784fs | 40%                                | 44.7%                      | <i>chr13:32913836</i> | <i>CA</i> | <i>CA/C</i> | c.5345_5345delA |
| <i>BRCA2</i> | p.D1420Y  | 32.5%                              | 29.9%                      | <i>chr13:32912750</i> | <i>G</i>  | <i>G/T</i>  | c.4258G>T       |
| <i>BRCA2</i> | p.I2675fs | 10%                                | 8.8%                       | <i>chr13:32937354</i> | <i>T</i>  | <i>T/TA</i> | c.8015_8016insA |

  

| Gene         | Mutation  | Expected Allelic Frequency (HD793) | Observed Allelic Frequency | Position              | Reference | Genotype    | Coding          |
|--------------|-----------|------------------------------------|----------------------------|-----------------------|-----------|-------------|-----------------|
| <i>BRCA1</i> | p.S1613G  | 50%                                | 49.5%                      | <i>chr17:41223094</i> | <i>T</i>  | <i>T/C</i>  | c.4900A>G       |
| <i>BRCA1</i> | p.K1183R  | 50%                                | 50%                        | <i>chr17:41244000</i> | <i>T</i>  | <i>T/C</i>  | c.3548A>G       |
| <i>BRCA1</i> | p.K820E   | 50%                                | 49.7%                      | <i>chr17:41245090</i> | <i>T</i>  | <i>T/C</i>  | c.2458A>G       |
| <i>BRCA1</i> | p.R1443X  | 0%                                 | 0%                         | -                     | -         | -           | -               |
| <i>BRCA1</i> | p.D435Y   | 50%                                | 48.7%                      | <i>chr17:41246245</i> | <i>C</i>  | <i>C/A</i>  | c.1303G>T       |
| <i>BRCA1</i> | p.P871L   | 100%                               | 100.0%                     | <i>chr17:41244936</i> | <i>G</i>  | <i>A/A</i>  | c.2612C>T       |
| <i>BRCA2</i> | p.N289H   | 50%                                | 51%                        | <i>chr13:32906480</i> | <i>A</i>  | <i>A/C</i>  | c.865A>C        |
| <i>BRCA2</i> | p.V2466A  | 100%                               | 100%                       | <i>chr13:32929387</i> | <i>T</i>  | <i>C/C</i>  | c.7397T>C       |
| <i>BRCA2</i> | p.N991D   | 50%                                | 48.4%                      | <i>chr13:32911463</i> | <i>A</i>  | <i>A/G</i>  | c.2971A>G       |
| <i>BRCA2</i> | p.K1691fs | 0%                                 | 0%                         | -                     | -         | -           | -               |
| <i>BRCA2</i> | p.N1784fs | 50%                                | 53.1%                      | <i>chr13:32913836</i> | <i>CA</i> | <i>CA/C</i> | c.5345_5345delA |
| <i>BRCA2</i> | p.D1420Y  | 0%                                 | 0%                         | -                     | -         | -           | -               |
| <i>BRCA2</i> | p.I2675fs | 0%                                 | 0%                         | -                     | -         | -           | -               |

  

| Gene         | Mutation  | Expected Allelic Frequency (HD794) | Observed Allelic Frequency | Position              | Reference | Genotype    | Coding          |
|--------------|-----------|------------------------------------|----------------------------|-----------------------|-----------|-------------|-----------------|
| <i>BRCA1</i> | p.S1613G  | 0%                                 | 0%                         | -                     | -         | -           | -               |
| <i>BRCA1</i> | p.K1183R  | 0%                                 | 0%                         | -                     | -         | -           | -               |
| <i>BRCA1</i> | p.K820E   | 0%                                 | 0%                         | -                     | -         | -           | -               |
| <i>BRCA1</i> | p.R1443X  | 0%                                 | 0%                         | -                     | -         | -           | -               |
| <i>BRCA1</i> | p.D435Y   | 0%                                 | 0%                         | -                     | -         | -           | -               |
| <i>BRCA1</i> | p.P871L   | 0%                                 | 0%                         | -                     | -         | -           | -               |
| <i>BRCA2</i> | p.N289H   | 0%                                 | 0%                         | -                     | -         | -           | -               |
| <i>BRCA2</i> | p.V2466A  | 100%                               | 100.0%                     | <i>chr13:32929387</i> | <i>T</i>  | <i>C/C</i>  | c.7397T>C       |
| <i>BRCA2</i> | p.N991D   | 0%                                 | 0%                         | -                     | -         | -           | -               |
| <i>BRCA2</i> | p.K1691fs | 0%                                 | 0%                         | -                     | -         | -           | -               |
| <i>BRCA2</i> | p.N1784fs | 0%                                 | 0%                         | -                     | -         | -           | -               |
| <i>BRCA2</i> | p.D1420Y  | 0%                                 | 0%                         | -                     | -         | -           | -               |
| <i>BRCA2</i> | p.I2675fs | 50%                                | 48.5%                      | <i>chr13:32937354</i> | <i>T</i>  | <i>T/TA</i> | c.8015_8016insA |

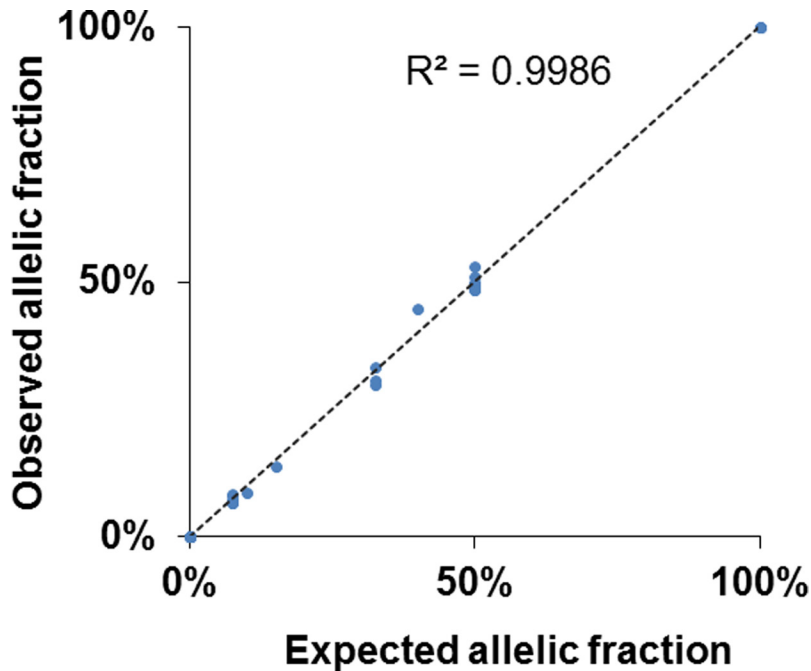

**Figure 1: High accuracy detection of *BRCA1/2* mutations using the OncoPrint® *BRCA1/2* Panel.** The dot plot shows the variant allelic fraction between expected values in standard samples (Horizon) and observed values using the OncoPrint® *BRCA1/2* Panel. Mutations were detected with a high level of accuracy and concordance (decision coefficient,  $R^2 = 0.9986$ ).

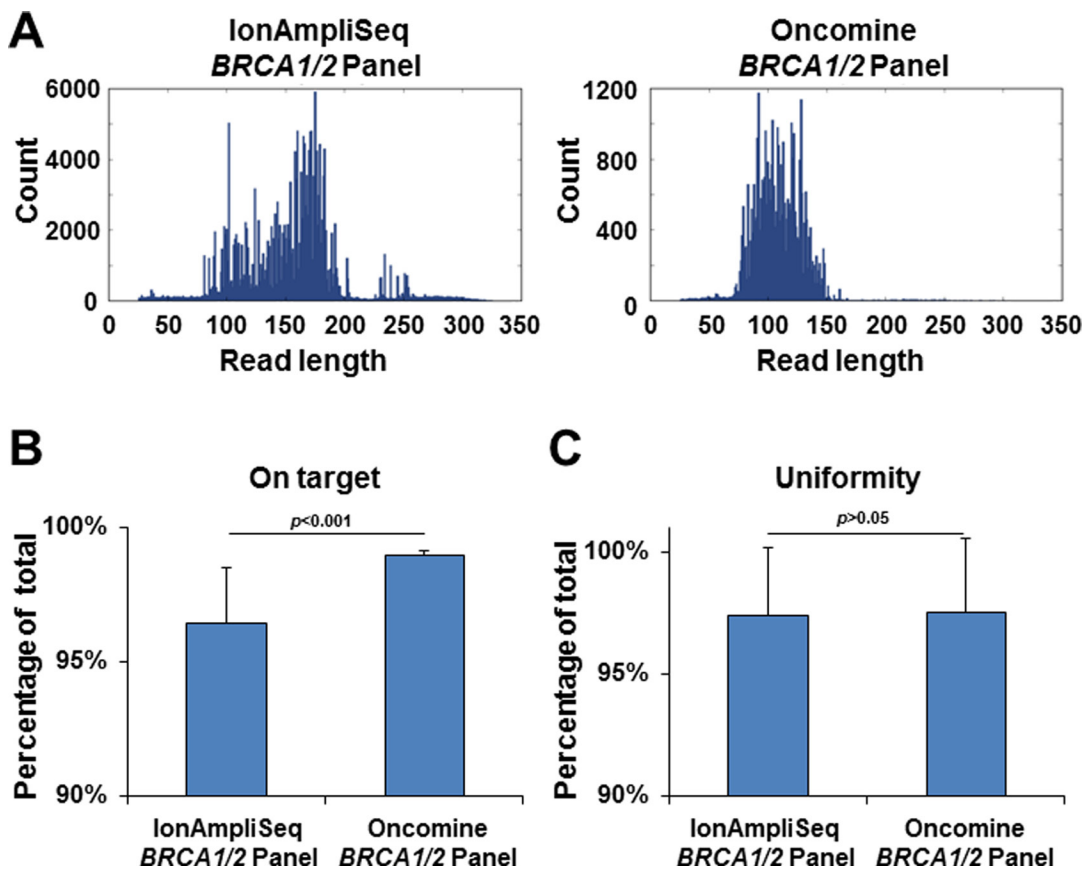

**Figure 2: Next-generation sequencing read length and quality control.** (A) Histogram of sequencing read lengths using the IonAmpliSeq™ *BRCA1/2* Panel (left) and OncoPrint® *BRCA1/2* Panel (right). This is a representative image from the sequencing data. (B) Percentage of mapped reads that were aligned over the target region. *P*-value was calculated by the Student's *t*-test. (C) Percentage of target base coverage at least  $>0.2 \times$  the mean coverage depth. *P*-value was calculated by the Student's *t*-test.

The *BRCA2* p.K3032fs mutation is a 4-bp deletion (c. 9090\_9093delAAAA) at the eight poly (A) homopolymer site (Figure 4B), which is located near the end of the amplicon (Figure 4A). Therefore, the sequencing reads may have been filtered out during the mapping reads process because of a low read quality or because they were outside the targeted region. The IonAmpliSeq™ *BRCA1/2* Panel did not detect the mutation using default variant call algorithm parameters, so we optimized this to enable *BRCA2* p.K3032fs detection. However, a low allelic fraction and low-depth data remained (allelic fraction: 38%, variant read/ total read = 28/73). This suggests that a low-depth region and low-quality base score increases the risk of obtaining a false-negative result. In contrast, the Oncomine® *BRCA1/2* Panel accurately detected *BRCA2* p.K3032fs, perhaps because of the inclusion of a higher number of amplicons at the target region.

### Copy number analysis

A previous study demonstrated that the IonAmpliSeq™ *BRCA1/2* Panel is not a feasible method for analyzing copy number alterations because of the high number of false-positive results obtained, and the fact that an MLPA assay is required [17]. We therefore examined whether the Oncomine® *BRCA1/2* Panel is suitable for analyzing copy number alterations. In our series, a large *BRCA1/2* genomic deletion had already been determined by the MLPA assay, and a *BRCA2* exon 21 to 27 deletion had been identified in one patient (case 22) [16]. To determine the copy number variation in 147 patients, we used sequencing reads data from the Oncomine® *BRCA1/2* panel and normalized SampleID sequencing reads from eight different loci. Among 147

patients, one (case 22) was shown to carry a large *BRCA2* genomic deletion at exon 21 to 27, which is consistent with MLPA assay findings (Figure 5A and Supplemental Table 4). Thus, there was 100% agreement between the MLPA assay and Oncomine® *BRCA1/2* Panel (Figure 5B and Supplemental Table 4). These data demonstrate that the Oncomine® *BRCA1/2* Panel accurately detects copy number variants.

## DISCUSSION

In this study, we used an early accessed version of the Oncomine® *BRCA1/2* Panel and compared its performance in next-generation sequencing with that of the IonAmpliSeq™ *BRCA1/2* Panel on the Ion PGM system. To our knowledge, this is the first direct comparison of the Oncomine® *BRCA1/2* Panel and IonAmpliSeq™ *BRCA1/2* Panel. Our results demonstrated Oncomine® *BRCA1/2* Panel enable us to simultaneously detect the germline variant and copy number alterations. Oncomine® *BRCA1/2* Panel accurately detects pathogenic *BRCA1/2* variants in patients with breast and/or ovarian cancer, so is feasible for use in cancer genome research and diagnostic purposes in a clinical setting.

Germline mutations in Mendelian disease genes or predisposed genes for hereditary cancers have been identified in the previous studies, and the detection of these is used for the clinical diagnosis of disease. Sanger sequencing, the gold standard method, is widely used for detecting germline mutations. However, it is expensive and laborious, especially when analyzing long-range targeted regions without hotspot mutation sites [18].

*BRCA1/2* encodes proteins with a high number of amino acids, while pathogenic variants are scattered

## Pathogenic variants

### Oncomine *BRCA1/2* Panel

|                                     |          | Positive | Negative |
|-------------------------------------|----------|----------|----------|
| IonAmpliSeq<br><i>BRCA1/2</i> Panel | Positive | 20       | 0        |
|                                     | Negative | 1        | 126      |

**Figure 3: Comparison of pathogenic *BRCA1/2* variants calling between the IonAmpliSeq™ *BRCA1/2* Panel and Oncomine® *BRCA1/2* Panel from 147 patients with breast and/or ovarian cancer. An overall agreement of 99.3% was achieved between the two panels, with 100% sensitivity and 95.2% specificity.**

**Table 2: Pathogenic variants detected by IonAmpliSeq™ *BRCA1/2* panel and Oncomine® *BRCA1/2* panel**

| Case #  | Gene         | Mutation  | Reference | Variant | IonAmpliSeq <i>BRCA1/2</i> Panel |                 |          |                  | Oncomine <i>BRCA1/2</i> Panel |                 |          |                  |
|---------|--------------|-----------|-----------|---------|----------------------------------|-----------------|----------|------------------|-------------------------------|-----------------|----------|------------------|
|         |              |           |           |         | Variant reads                    | Reference reads | Coverage | Allelic fraction | Variant reads                 | Reference reads | Coverage | Allelic fraction |
| Case 1  | <i>BRCA1</i> | p.L63X    | A         | T       | 291                              | 273             | 564      | 52%              | 155                           | 179             | 334      | 46%              |
| Case 2  | <i>BRCA1</i> | p.K652fs  | T         | TC      | 203                              | 245             | 448      | 45%              | 175                           | 242             | 417      | 42%              |
| Case 3  | <i>BRCA1</i> | p.Q934X   | G         | A       | 211                              | 189             | 400      | 53%              | 62                            | 76              | 138      | 45%              |
| Case 4  | <i>BRCA1</i> | p.Q934X   | G         | A       | 242                              | 241             | 483      | 50%              | 78                            | 77              | 155      | 50%              |
| Case 5  | <i>BRCA1</i> | p.E1257fs | CCT       | C       | 215                              | 231             | 446      | 48%              | 92                            | 83              | 175      | 53%              |
| Case 6  | <i>BRCA2</i> | p.Q609X   | C         | T       | 665                              | 718             | 1383     | 48%              | 352                           | 550             | 902      | 39%              |
| Case 7  | <i>BRCA2</i> | p.E790fs  | AG        | A       | 584                              | 573             | 1157     | 50%              | 594                           | 647             | 1241     | 48%              |
| Case 8  | <i>BRCA2</i> | p.Q850fs  | A         | ACC     | 78                               | 81              | 159      | 49%              | 148                           | 217             | 365      | 41%              |
| Case 9  | <i>BRCA2</i> | p.Q864fs  | AT        | A       | 185                              | 212             | 397      | 47%              | 83                            | 73              | 156      | 53%              |
| Case 10 | <i>BRCA2</i> | p.S1882X  | C         | A       | 87                               | 77              | 164      | 53%              | 186                           | 194             | 380      | 49%              |
| Case 11 | <i>BRCA2</i> | p.N1287fs | GA        | G       | 213                              | 291             | 504      | 42%              | 123                           | 94              | 217      | 57%              |
| Case 12 | <i>BRCA2</i> | p.T1388fs | TTTAAAC   | T       | 811                              | 873             | 1684     | 48%              | 99                            | 142             | 241      | 41%              |
| Case 13 | <i>BRCA2</i> | p.S1882X  | C         | A       | 137                              | 132             | 269      | 51%              | 182                           | 197             | 379      | 48%              |
| Case 14 | <i>BRCA2</i> | p.S1882X  | C         | A       | 446                              | 486             | 932      | 48%              | 132                           | 133             | 265      | 50%              |
| Case 15 | <i>BRCA2</i> | p.N2135fs | ATAACT    | A       | 123                              | 173             | 296      | 42%              | 67                            | 76              | 143      | 47%              |
| Case 16 | <i>BRCA2</i> | p.I2149fs | CTA       | C       | 618                              | 654             | 1272     | 49%              | 88                            | 103             | 191      | 46%              |
| Case 17 | <i>BRCA2</i> | p.I2149fs | CTA       | C       | 392                              | 359             | 751      | 52%              | 109                           | 129             | 238      | 46%              |
| Case 18 | <i>BRCA2</i> | p.G2281fs | TAGAG     | T       | 210                              | 234             | 444      | 47%              | 56                            | 64              | 120      | 47%              |
| Case 19 | <i>BRCA2</i> | p.R2318X  | C         | T       | 29                               | 62              | 91       | 32%              | 38                            | 52              | 90       | 42%              |
| Case 20 | <i>BRCA2</i> | p.I2675V  | A         | G       | 97                               | 76              | 173      | 56%              | 76                            | 88              | 164      | 46%              |
| Case 21 | <i>BRCA2</i> | p.K3032fs | CAAAA     | C       | ND                               | ND              | ND       | ND               | 204                           | 196             | 400      | 51%              |

ND, not detected

throughout the coding regions. To overcome these problems, next-generation sequencing technology can be used for genomic analyses, and a range of assay panels are available for amplicon-based targeted next-generation sequencing, including IonAmpliSeq™ and the Oncomine® *BRCA1/2* Panel (Thermo Fisher Scientific), BRCA MASTR Dx (Multiplicom, Niel, Belgium), TruSeq (Illumina, San Diego, CA, USA), GeneRead Human *BRCA1/2* Panel (Qiagen), HaloPlex (Agilent Technologies, Santa Clara, CA), and custom-designed panels [18–23]. These technologies offer a powerful tool for use in clinical oncology.

In the present analysis, we investigated the sequencing performance of the Oncomine® *BRCA1/2* Panel by comparing data with those obtained from the previously available IonAmpliSeq™ *BRCA1/2* Panel [15]. The Oncomine® *BRCA1/2* Panel was capable of identifying a deletion at a homopolymer site, which was not detected by the IonAmpliSeq™ *BRCA1/2* Panel. The on target rate of mapping reads was significantly higher using the Oncomine® *BRCA1/2* Panel than the IonAmpliSeq™ Panel (Figure 2B). Thus, the sequencing reads were mapped across the board target region. Recently, false-negative variant calling was reported in a study in which primers were designed to amplify a rare single nucleotide polymorphism, because the single

nucleotide polymorphism was located in the primer-binding site [22]. This result suggests that a sufficient number of amplicons, as included in the Oncomine® *BRCA1/2* Panel, decreases the possibility of obtaining low-depth regions, low-quality mapped reads, and false-negative results.

When 8 samples were analyzed in a reaction, the running cost per sample is 34,000 JPY (340 USD) for Oncomine® *BRCA1/2* Panel, 19,000 JPY (190 USD) for Ion AmpliSeq™ *BRCA1/2* Panel and 190,000 JPY (1,900 USD) for Sanger sequencing. Although the cost of Oncomine® *BRCA1/2* Panel is slightly higher than that of Ion AmpliSeq™ *BRCA1/2* Panel, single nucleotide variant, small indel and CNV were simultaneously detected with streamlined workflow using Oncomine® *BRCA1/2* Panel and IonReporter Software. Additionally, the Oncomine® *BRCA1/2* Panel includes internal control primer amplicons, so copy number analysis is feasible without the need for other reference standards. Thus, next-generation sequencing using the Oncomine® *BRCA1/2* Panel will obtain genetic information about single nucleotide variants and copy number variation while reducing turnaround times and costs. This improved design of assay panel could therefore become an alternative or replacement for Sanger sequencing and the MLPA assay.

Germline or somatic mutations, copy number loss, and DNA methylation frequently occur in *BRCA1/2* in breast and ovarian cancer [24, 25]. These genetic and epigenetic alterations diminish *BRCA1/2* functions and dysregulate the DNA repair pathway. PARP inhibitors were previously shown to have a synthetically lethal therapeutic effect on *BRCA*-deficient tumor cells [2]. PARP inhibitors have therefore been approved for

use in advanced ovarian cancer patients harboring germline *BRCA1/2* mutations in both the USA and Europe, but not in Japan yet. Given that this therapy will be approved for patients with *BRCA*-deficient cancer caused by somatic events, diagnostic demand is expected to increase for the analysis of *BRCA1/2* somatic mutations and copy number alterations. The simultaneous detection of mutations and copy number

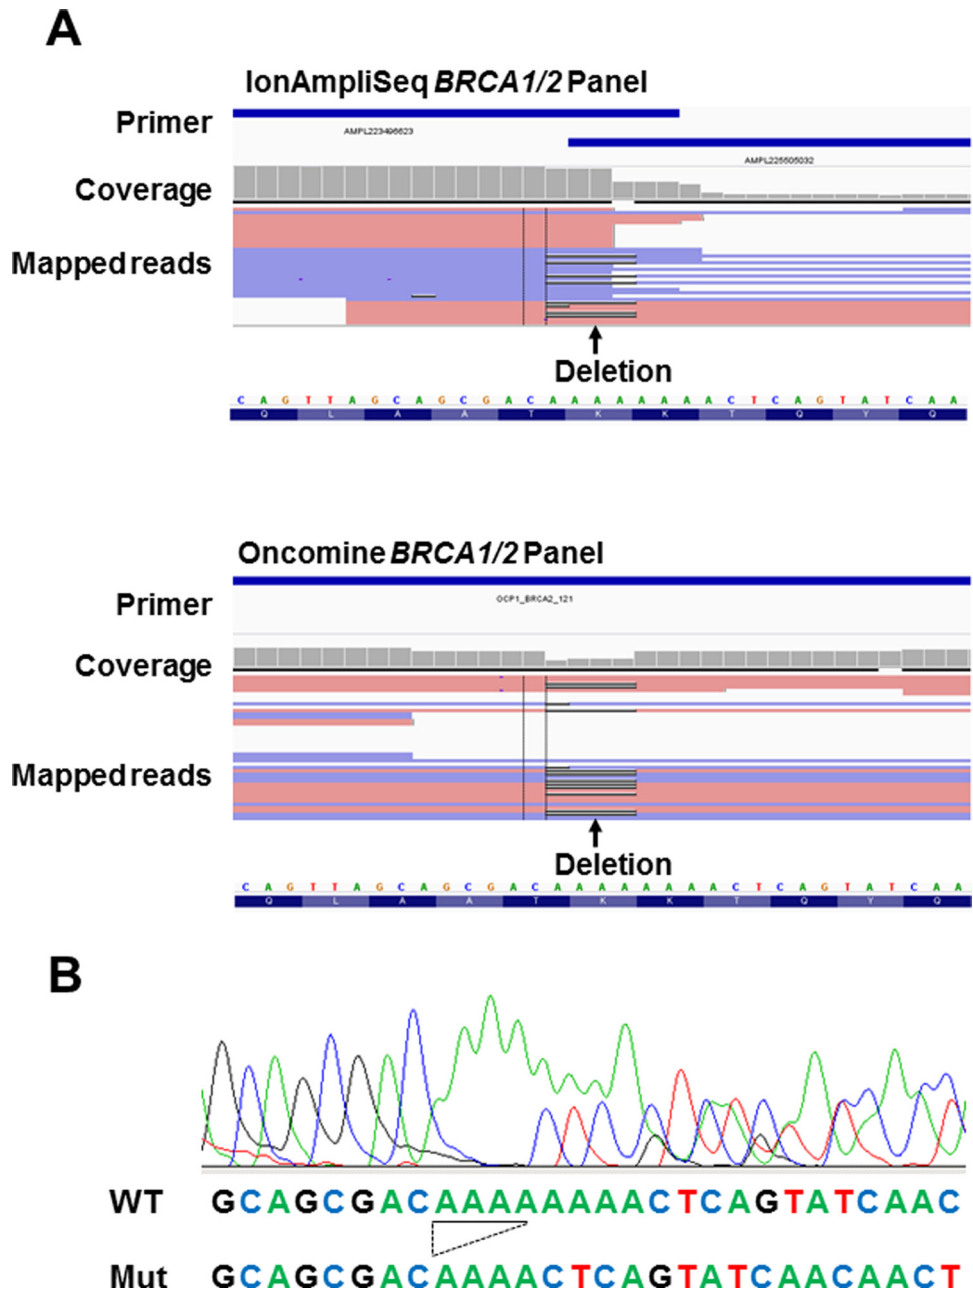

**Figure 4: Analysis of the discordant sample.** (A) Read alignment of the discrepant result between the IonAmpliSeq™ *BRCA1/2* Panel (top) and Oncomine® *BRCA1/2* Panel (bottom) in case 21. Arrow indicates the position of the deletion (*BRCA2* p.K3032fs; c. 9090\_9093delAAAA, black line in mapped reads data). The primer position is indicated by a blue line at the top of the image. The mutation missed by the IonAmpliSeq™ *BRCA1/2* Panel is located at the end of the primer position. (B) Diagram of Sanger sequencing data. The *BRCA2* p.K3032fs mutation was detected in case 21. This mutation was detected using next-generation sequencing data of the Oncomine® *BRCA1/2* Panel, but not using the IonAmpliSeq™ *BRCA1/2* Panel with default variant call algorithm parameters. The nucleotide sequences of wild-type (WT) and mutant (Mut) are given at the bottom. The deletion is underlined.

alterations is an attractive and useful prospect for clinical settings. Therefore, the Oncomine® *BRCA1/2* Panel offers an improved and accurate assay method that is likely to accelerate the sequential procedures of genetic counseling [26], diagnosis, prevention, and treatment decisions for eligible patients.

## METHODS

### Early access program

Since April 2016, our genome analysis center has participated in the early access program and used early

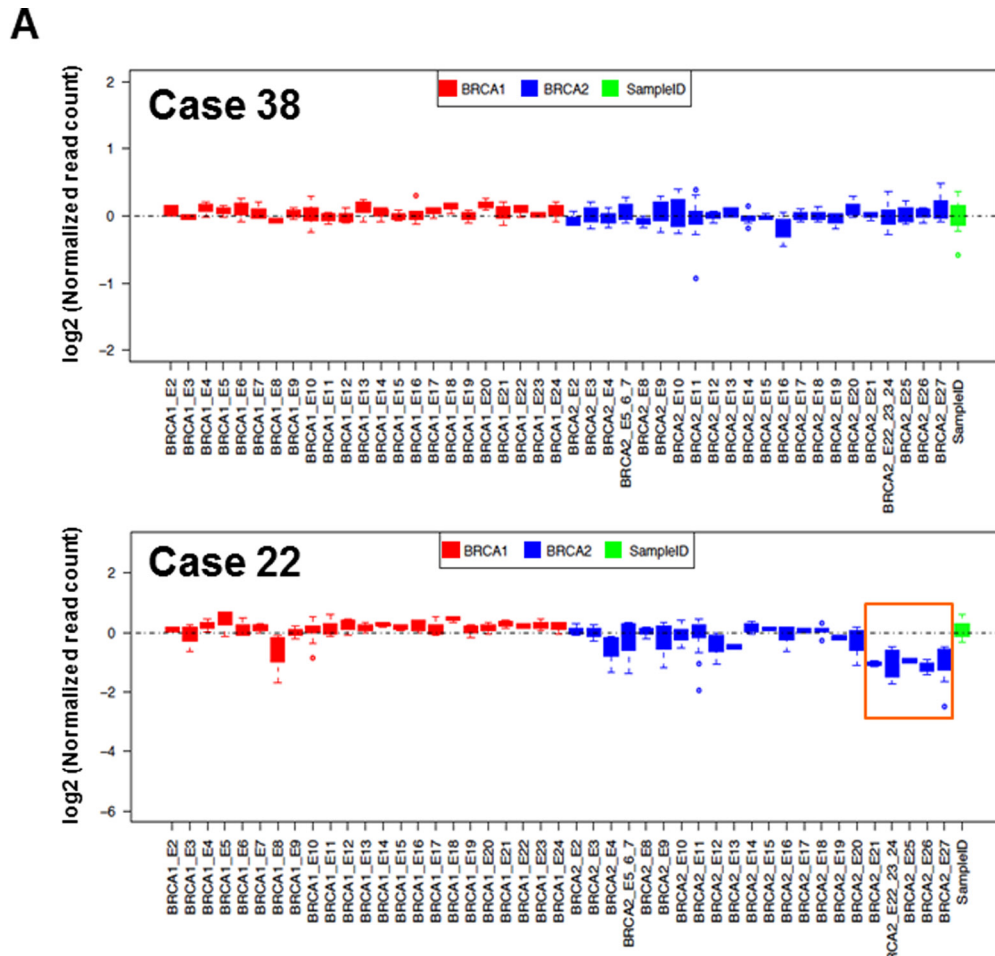

**B**

Copy number variants

Oncomine *BRCA1/2* Panel

|            |          | Positive | Negative |
|------------|----------|----------|----------|
| MLPA assay | Positive | 1        | 0        |
|            | Negative | 0        | 146      |

**Figure 5: Copy number analysis identified a large genomic deletion.** (A) Representative images from a patient with no copy number alteration (upper, case 38) and with a *BRCA2* exon 21-27 deletion (lower, case 22). The orange box indicates the deletion locus. Sequencing reads of *BRCA1* (red) and *BRCA2* (blue) loci were normalized with SampleID tag sequencing reads (green). (B) Comparison of copy number alterations between the MLPA assay and Oncomine® *BRCA1/2* Panel from 147 patients with breast and/or ovarian cancer. An overall agreement of 100% between the two assays was achieved, with 100% sensitivity and 100% specificity.



access version of OncoPrint<sup>®</sup> *BRCA1/2* Panel. Program participants received free primer pools targeting *BRCA1/2* genes from Thermo Fisher Scientific (Waltham, MA).

### Sample preparation and patients

For standard genomic DNA samples, BRCA Germline I (HD793), BRCA Germline II (HD794) and BRCA Somatic Multiplex (HD795) were purchased from Horizon (Cambridge, UK). Peripheral blood samples were obtained from 147 breast and/or ovarian cancer patients who attended our hospital [15, 16]. Buffy coats were isolated following centrifugation of peripheral blood samples and frozen at  $-80^{\circ}\text{C}$  until DNA extraction. Buffy coat DNA was extracted using the QIAamp DNA Blood Mini QIAcube Kit (Qiagen, Hilden, Germany) with the QIAcube (Qiagen). The concentration of DNA was determined using the Nano Drop 2000 spectrophotometer (Thermo Fisher Scientific). All patients provided written informed consent for the genetic research study, which was performed in accordance with the protocols approved by the Institutional Review Board at Yamanashi Central Hospital according to the relevant national guidelines.

### Next generation sequencing

We used The Ion AmpliSeq<sup>™</sup> *BRCA1/2* Panel containing 167 primer pairs in three pools and the OncoPrint<sup>®</sup> *BRCA1/2* Panel containing 275 primer pairs in two pools (Supplementary Table 1). These two panels cover all exons of *BRCA1/2* coding regions and exon–intron boundaries. The amount of DNA required for the IonAmpliSeq<sup>™</sup> *BRCA1/2* Panel is 30 ng, while 20 ng is needed for the OncoPrint<sup>®</sup> *BRCA1/2* Panel. This latter panel also uses a lower number of primer pools, therefore enabling the analysis to be performed in a less laborious manner during library preparation.

To compare with performances between these panels, previously published data of The Ion AmpliSeq<sup>™</sup> *BRCA1/2* Panel was used [15, 16]. Targeted sequencing using OncoPrint<sup>®</sup> *BRCA1/2* Panel was performed according to the manufacturer's protocol. In brief, multiplex PCR was performed with a premixed primer pool using Ion AmpliSeq Library Kit 2.0 (Thermo Fisher Scientific). Multiplex PCR condition is as follow:  $99^{\circ}\text{C}$  for 2 min; 18 cycles of  $99^{\circ}\text{C}$  for 15 sec,  $60^{\circ}\text{C}$  for 4 min; and  $10^{\circ}\text{C}$  for hold (16 hours maximum). PCR amplicons of each primer pool were combined and partially digested primer sequences with  $2\mu\text{l}$  FuPa reagent as following condition: at  $50^{\circ}\text{C}$  for 10 min;  $55^{\circ}\text{C}$  for 10 min;  $60^{\circ}\text{C}$  for 20 min. Amplicon product was ligated to barcodes adaptors with IonXpress Barcode kit (Thermo Fisher Scientific) for 30 min at  $22^{\circ}\text{C}$  then  $72^{\circ}\text{C}$  for 10 min. Adaptor ligated libraries were purified using Agencourt AMPure XP reagents (Beckman Coulter, Brea, CA).

The library concentration was determined using an Ion Library Quantitation Kit (Thermo Fisher Scientific). Emulsion PCR was carried out using the Ion OneTouch<sup>™</sup> System and Ion PGM<sup>™</sup> Hi-Q<sup>™</sup> OT2 Kit (Thermo Fisher Scientific) according to the manufacturer's instructions. Next generation sequencing was performed on the Ion PGM system using Ion PGM Hi-Q Sequencing Kit (Thermo Fisher Scientific).

### Data analysis

Sequence data were processed using standard Ion Torrent Suite Software running on the Torrent Server. Raw signal data were analyzed using Torrent Suite version 5.0.4. The data processing pipeline involved signaling processing, base calling, quality score assignment, adapter trimming, PCR duplicate removal, read alignment to the human genome 19 reference (hg19), quality control of mapping quality, coverage analysis [27, 28]. Following data analysis, the annotation of single nucleotide variants, insertions, and deletions was performed by the Ion Reporter Server System (Thermo Fisher Scientific) [19, 29]. For Standard Reference Germline I and Germline II DNA (HD793 and HD794) and DNA extracted from 147 patient's lymphocyte, germline variant calling parameter were used (Single sample analysis, Variant Type Detection = Germline default parameter). For BRCA Somatic Multiplex DNA, somatic variant calling parameter were used (Single sample analysis, Variant Type Detection = Somatic default parameter, Indel Min Variant allelic fraction  $>0.05$ ). The minimum count for mutant allele reads was  $\geq 5$ , the coverage depth was  $\geq 30$ . Splice site alternations were analyzed 2 bp upstream or downstream of exon–intron boundaries. Pathogenic variants were defined as mutations causing protein-truncating mutations (nonsense, frameshift insertion, frameshift deletion) or splice site mutation [15]. Sequence data were visually confirmed with the Integrative Genomics Viewer (IGV) and any sequence, alignment, or variant call error artifacts were discarded. We followed the term and interpretation of sequence variants recommended in the American College of Medical Genetics and Genomics (ACMG) guidelines [30].

### Copy number analysis

Copy number variants were determined according to the original algorithm pipeline developed by Thermo Fisher Scientific. SampleID (8 amplicons amplified different chromosomes loci) was used as internal control to normalize data. To determine the sensitivity and specificity, copy number data was compared with the results of the MLPA assay (MRC-Holland, Amsterdam, the Netherlands). MLPA assay has been already performed using buffy coat DNA as previously described [16].

## Sanger sequencing

One discordant sequencing data was validated by Sanger sequencing. PCR was performed using DNA as a template and primer pairs flanking the pathogenic variant sites (*BRCA2* p.K3032fs). Forward primer: (5'-GATGTCACAACCGTGTGGAA-3') and reverse primer (5'-GCCAACTGGTAGCTCCAACTAA-3') were used in PCR reaction. PCR products were separated on 2% agarose gel electrophoresis to confirm PCR products and purified using the Agencourt AMPure XP reagents (Beckman coulter, Brea, CA) according to the manufacturer's instructions. Sequencing was performed with BigDye Terminator v3.1 using the same forward or reverse primers used for first PCR amplification [31]. Sequencing PCR products were purified and subsequently analyzed by the 3500 Genetic Analyzer (Thermo Fisher Scientific). GenBank sequences of human *BRCA1* (RefSeq accession number: NM\_007294.3 and NP\_009225.1) and *BRCA2* (RefSeq accession number: NM\_000059.3 and NP\_000050.2) were referred to at the NCBI Reference Sequence Database.

## Author contributions

Y.H. wrote the main manuscript text and prepared figures and tables. Y.H. and Y.O. performed the experiments. Y.H., I.S., H.N. and M.O. developed the concept and design. I.S. and H.N. collected informed consents from patients. Y.H., I.S. and H.N. interpreted the data. M.O. supervised the experimental design and laboratory processes, and involved in the final editing. All authors reviewed the manuscript and have given approval to its final version.

## ACKNOWLEDGMENTS

We also thank all medical and ancillary staff of the hospital and the patients for consenting to participate. We also thank Charles Scafe, Jon Sherlock, Jin Katayama and Sachiro Asano for their technical help.

## CONFLICTS OF INTEREST

The authors have no conflict of interest to declare.

## FUNDING

This study was supported by a Grant-in-Aid for Genome Research Project from the Yamanashi Prefecture (Y.H. and M.O.), the grant from The YASUDA Medical Foundation (Y.H.) and Research Grant for Young Scholars (Y.H.).

## REFERENCES

1. Couch FJ, Nathanson KL, Offit K. Two Decades After BRCA: Setting Paradigms in Personalized Cancer Care and Prevention. *Science*. 2014; 343:1466–1470.
2. Lord CJ, Ashworth A. The DNA damage response and cancer therapy. *Nature*. 2012; 481:287–94.
3. King MC, Marks J, Mandell J, New York Breast Cancer Study Group. Breast and Ovarian Cancer Risks Due to Inherited Mutations in *BRCA1* and *BRCA2*. *Science*. 2003; 302:643–646.
4. Miki Y, Swensen J, Shattuck-Eidens D, Futreal PA, Harshman K, Tavtigian S, Liu Q, Cochran C, Bennett L, Ding W, Bell R, Rosenthal J, Hussey C, et al. A Strong Candidate for the Breast and Ovarian Cancer Susceptibility Gene *BRCA1*. *Science*. 1994; 266:66–71.
5. Easton DF, Bishop DT, Ford D, Crockford GP. Genetic Linkage Analysis in Familial Breast and Ovarian Cancer: Results from 214 Families Consortium'. *Am J Hum Genet*. 1993; 52:678–701.
6. Antoniou A, Pharoah PD, Narod S, Risch HA, Eyfjord JE, Hopper JL, Loman N, Olsson H, Johannsson O, Borg A, Pasini B, Radice P, Manoukian S, et al. Average Risks of Breast and Ovarian Cancer Associated with *BRCA1* or *BRCA2* Mutations Detected in Case Series Unselected for Family History: A Combined Analysis of 22 Studies. *Am J Hum Genet*. 2003; 72:1117–1130.
7. Narod SA, Ford D, Devilee P, Barkardottir RB, Lynch HT, Smith SA, Ponder BA, Weber BL, Garber JE, Birch JM, Cornelis RS, Kelsell DP, Spurr NK, et al. An Evaluation of Genetic Heterogeneity in 145 Breast-Ovarian Cancer Families. *Am J Hum Genet*. 1995; 59:254–264.
8. Hall JM, Lee MK, Newman B, Morrow JE, Anderson LA, Huey B, King MC. Linkage of Early-Onset Familial Breast Cancer to Chromosome 17q21. *Science*. 1990; 250:1684–1689.
9. Wooster R, Neuhausen SL, Mangion J, Quirk Y, Ford D, Collins N, Nguyen K, Seal S, Tran T, Averill D, Fields P, Marshall G, Narod S, et al. Localization of a breast cancer susceptibility gene, *BRAC2*, to chromosome 13q12-13. *Science*. 1994; 265:2088–2090.
10. Longo DL, Hartmann LC, Lindor NM. The role of risk-reducing surgery in hereditary breast and ovarian cancer. *N Engl J Med*. 2016; 374:454–468.
11. Ledermann J, Harter P, Gourley C, Friedlander M, Vergote I, Rustin G, Scott CL, Meier W, Shapira-Frommer R, Safra T, Matei D, Fielding A, Spencer S, et al. Olaparib maintenance therapy in patients with platinum-sensitive relapsed serous ovarian cancer: A preplanned retrospective analysis of outcomes by *BRCA* status in a randomised phase 2 trial. *Lancet Oncol*. 2014; 15:852–861.
12. Kaufman B, Shapira-Frommer R, Schmutzler RK, Audeh MW, Friedlander M, Balmaña J, Mitchell G, Fried G, Stemmer SM, Hubert A, Rosengarten O, Steiner M, Loman

- N, et al. Olaparib Monotherapy in Patients With Advanced Cancer and a Germline BRCA1/2 Mutation. *J Clin Oncol*. 2014; 33:1–8.
13. Van Dijk EL, Auger H, Jaszczyszyn Y, Thermes C. Ten years of next-generation sequencing technology. *Trends Genet*. 2014; 30:1–9.
  14. Chen K, Yang D, Li X, Sun B, Song F, Cao W, Brat DJ, Gao Z, Li H, Liang H, Zhao Y, Zheng H, Li M, et al. Mutational landscape of gastric adenocarcinoma in Chinese: implications for prognosis and therapy. *Proc Natl Acad Sci U S A*. 2015; 112:1107–12.
  15. Hirotsu Y, Nakagomi H, Sakamoto I, Amemiya K, Mochizuki H, Omata M. Detection of BRCA1 and BRCA2 germline mutations in Japanese population using next-generation sequencing. *Mol Genet Genomic Med*. 2015; 3:121–129.
  16. Sakamoto I, Hirotsu Y, Nakagomi H, Ouchi H, Ikegami A, Teramoto K, Amemiya K, Mochizuki H, Omata M. BRCA1 and BRCA2 mutations in Japanese patients with ovarian, fallopian tube, and primary peritoneal cancer. *Cancer*. 2016; 122:84–90.
  17. Pilato B, Pinto R, De Summa S, Petriella D, Lacalamita R, Danza K, Paradiso A, Tommasi S. BRCA1-2 Diagnostic Workflow from Next-Generation Sequencing Technologies to Variant Identification and Final Report. *Genes Chromosomes Cancer*. 2016; 55:803–813.
  18. Trujillano D, Weiss ME, Schneider J, Köster J, Papachristos EB, Saviouk V, Zakharkina T, Nahavandi N, Kovacevic L, Rolfes A. Next-generation sequencing of the BRCA1 and BRCA2 genes for the genetic diagnostics of hereditary breast and/or ovarian cancer. *J Mol Diagnostics*. 2015; 17:162–170.
  19. Feliubadaló L, Lopez-Doriga A, Castellsagué E, del Valle J, Menéndez M, Tornero E, Montes E, Cuesta R, Gómez C, Campos O, Pineda M, González S, Moreno V, et al. Next-generation sequencing meets genetic diagnostics: development of a comprehensive workflow for the analysis of BRCA1 and BRCA2 genes. *Eur J Hum Genet*. 2013; 21:864–70.
  20. Ellison G, Huang S, Carr H, Wallace A, Ahdesmaki M, Bhaskar S, Mills J. A reliable method for the detection of BRCA1 and BRCA2 mutations in fixed tumour tissue utilising multiplex PCR-based targeted next generation sequencing. *BMC Clin Pathol*. 2015; 15:5.
  21. Walsh T, Casadei S, Lee MK, Pennil CC, Nord AS, Thornton AM, Roeb W, Agnew KJ, Stray SM, Wickramanayake A, Norquist B, Pennington KP, Garcia RL, et al. Mutations in 12 genes for inherited ovarian, fallopian tube, and peritoneal carcinoma identified by massively parallel sequencing. *Proc Natl Acad Sci U S A*. 2011; 108:18032–7.
  22. Shin S, Hwang IS, Lee ST, Choi JR. Evaluation of an amplicon-based next-generation sequencing panel for detection of BRCA1 and BRCA2 genetic variants. *Breast Cancer Res Treat*. 2016; 158:433–40. <https://doi.org/10.1007/s10549-016-3891-z>.
  23. Enyedi MZ, Jaksa G, Pintér L, Sükösd F, Gyuris Z. Simultaneous detection of BRCA mutations and large genomic rearrangements in germline DNA and FFPE tumor samples. *Oncotarget*. 2016; 7:61845–61859. <https://doi.org/10.18632/oncotarget.11259>.
  24. Koboldt DC, Fulton RS, McLellan MD, Schmidt H, Kalicki-Veizer J, McMichael JF, Fulton LL, Dooling DJ, Ding L, Mardis ER, Wilson RK, Alty A, Balasundaram M, et al. Comprehensive molecular portraits of human breast tumours. *Nature*. 2012; 490:61–70.
  25. Bell D, Berchuck A, Birrer M, Chien J, Cramer D, Dao F, Dhir R, DiSaia P, Gabra H, Glenn P, Godwin A, Gross J, Hartmann L, et al. Integrated genomic analyses of ovarian carcinoma. *Nature*. 2011; 474:609–615.
  26. Nakagomi H, Sakamoto I, Hirotsu Y, Amemiya K, Mochizuki H, Inoue M, Nakagomi S, Kubota T, Omata M. Willingness of Japanese patients with breast cancer to have genetic testing of BRCA without burden of expenses. *Breast Cancer*. 2015; 23:649–53. <https://doi.org/10.1007/s12282-015-0618-7>.
  27. Goto T, Hirotsu Y, Oyama T, Amemiya K, Omata M. Analysis of tumor-derived DNA in plasma and bone marrow fluid in lung cancer patients. *Med Oncol*. 2016; 33:29.
  28. Hirotsu Y, Nakagomi H, Sakamoto I, Amemiya K, Oyama T, Mochizuki H, Omata M. Multigene panel analysis identified germline mutations of DNA repair genes in breast and ovarian cancer. *Mol Genet Genomic Med*. 2015; 3:459–66.
  29. Hirotsu Y, Kojima Y, Okimoto K, Amemiya K, Mochizuki H, Omata M. Comparison between two amplicon-based sequencing panels of different scales in the detection of somatic mutations associated with gastric cancer. *BMC Genomics*. 2016; 17.
  30. Richards S, Aziz N, Bale S, Bick D, Das S, Gastier-Foster J, Grody WW, Hegde M, Lyon E, Spector E, Voelkerding K, Rehm HL. Standards and guidelines for the interpretation of sequence variants: a joint consensus recommendation of the American College of Medical Genetics and Genomics and the Association for Molecular Pathology. *Genet Med*. 2015; 17:405–423.
  31. Hirotsu Y, Nakagomi H, Amemiya K, Oyama T, Inoue M, Mochizuki H, Omata M. Intrinsic HER2 V777L mutation mediates resistance to trastuzumab in a breast cancer patient. *Med Oncol*. 2017; 34.
